# Supplementary material for: Long- and short-term temporal variability in cloud condensation nuclei spectra over a wide supersaturation range in the Southern Great Plains site
Source: Copernicus journal article supplement (doi:10.5194/acp-22-6197-2022), 2022-05-11
Supplement: Supplementary file 1 [file acp-22-6197-2022-supplement.zip]

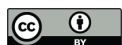

*Supplement of*

## **Long- and short-term temporal variability in cloud condensation nuclei spectra over a wide supersaturation range in the Southern Great Plains site**

**Russell J. Perkins et al.**

*Correspondence to:* Russell J. Perkins (rperkins@colostate.edu)

- acp-22-6197-2022-supplement-title-page.pdf
- aurtocorr fit coeffs.xlsx

The copyright of individual parts of the supplement might differ from the article licence.
